# Supplementary material for: Integrated analysis of lncRNA and mRNA reveals novel insights into cashmere fineness in Tibetan cashmere goats
Source: PeerJ journal article supplement (doi:10.7717/peerj.10217), 2020-11-09
Supplement: Table_S1.docx [file Table_S1.docx]

| **Genes and LncRNAs** | **Primer Sequences (5’-3’)** | **Production Size (bp)** | |
| --- | --- | --- | --- |
| COL4A3BP | F: TAGACGCCATTGAGCAGCACAAG  R: GGAGGTGGATGTCGCAGAATAGC | 122 |
| KRT85 | F: GCGTGAAGCAAGAGGAGAAGGAG  R: TGCTCTCACAACACTGGCGATTC | 147 |
| KRT33A | F: CCTCAAGCAGAACCACGAGCAG  R: GCGGCATCCACCTCCACATTG | 81 |
| SELE | F: AGCAGGTCCCAGTTTGTGAAGTG  R: CTACAGAGCCATTGAGCGTCCATC | 144 |
| FOS | F: ACTACCACTCACCGGCAGACTC  R: TGGGATGAAGTTGGCACTGGAAAC | 101 |
| FOSB | F: TCCGCCGAGTCTCAGTATCTGTC  R: TGGAGGTCCTGGCTGGTTGTG | 146 |
| MSTRG.5970.13 | F: AGGGTTTCGTTCAGCAGTGAGTTC  R: TCTGACGCTGGGGAAGGTGAAC | 107 |
| MSTRG.17103.10 | F: CCCCGATTCAGGGTCAGGAGTAG  R: CGACGACACCAAGGGCTTCTTC | 94 |
| MSTRG.17271.25 | F: CGAGCTGCGTCGAGCGTTTC  R: GGTGTGCTGCTTTCCGTCTGAC | 146 |
| MSTRG.6712.3 | F: TGAGCCTGCATCTCCAGTTCCTAG  R: GAGCAAGCAACCGACCGTCTG | 113 |
| MSTRG.9227.3 | F: GAGGGGCGAGGAATTGCGATATG  R: GAGCAGTCACACCAGGTCATCTTC | 141 |
| ENSCHIT00000009853.1 | F: ACCATCTCATCCTCTGTCGTTCCC  R: CACTGGAAGGACTGATGCTGAAGC | 137 |
