# Supplementary material for: Integrated analysis of lncRNA and mRNA reveals novel insights into cashmere fineness in Tibetan cashmere goats
Source: PeerJ journal article supplement (doi:10.7717/peerj.10217), 2020-11-09
Supplement: Table_S2.docx [file Table_S2.docx]

| **Sample** | **Total Reads** | **Clean Reads** | **Clean Ratio** | **No rRNA** | **rRNA Ratio** | **Mapped Reads** | **Pair Mapped Reads** | **Single Mapped Reads** | **Mapped Ratio** |
| --- | --- | --- | --- | --- | --- | --- | --- | --- | --- |
| F_1 | 94864374 | 93703940 | 98.78% | 91200398 | 2.67% | 87929889 | 86031306 | 1898583 | 96.41% |
| F_2 | 124969616 | 124146558 | 99.34% | 121549712 | 2.09% | 117279638 | 114578022 | 2701616 | 96.49% |
| F_3 | 119025994 | 118185684 | 99.29% | 116414000 | 1.50% | 112351310 | 109787042 | 2564268 | 96.51% |
| F_4 | 125691854 | 124735212 | 99.24% | 122636082 | 1.68% | 118393826 | 115596168 | 2797658 | 96.54% |
| C_1 | 129404980 | 128478482 | 99.28% | 126418484 | 1.60% | 122036885 | 119267744 | 2769141 | 96.53% |
| C_2 | 127787420 | 126995786 | 99.38% | 124704472 | 1.80% | 120287746 | 117486196 | 2801550 | 96.46% |
| C_3 | 145697692 | 143563754 | 98.54% | 141545108 | 1.41% | 136347531 | 133136358 | 3211173 | 96.33% |
| C_4 | 177753198 | 175667720 | 98.83% | 171835436 | 2.18% | 165720713 | 162054518 | 3666195 | 96.44% |
| Mean | 130649391 | 129434642 | 99.09% | 127037962 | 1.87% | 122543442 | 119742169 | 2801273 | 96.46% |
